# Supplementary material
Source: PubMed Central journal article supplement (PMC3775419)
Supplement: supp_dev.099838_DEV099838.pdf [file supp_dev.099838_DEV099838.pdf]

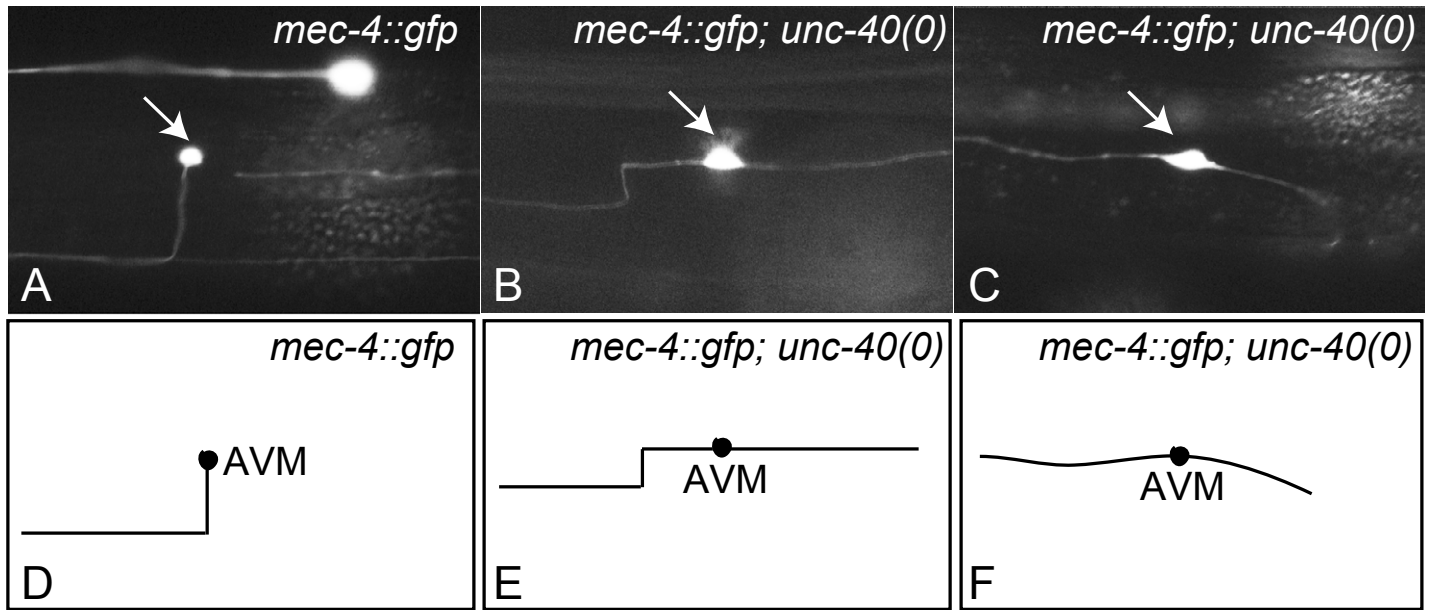

**Fig. S1. The AVM migration defects of *unc-40* mutants.** Photomicrographs (A-C) and corresponding schematics (D-F) of animals showing the AVM cell body (arrow) and axon projections as marked by *mec-4::gfp*. Anterior is to the left and dorsal is up. In wild-type animals (A,D), the AVM axon first migrates ventrally and then turns anteriorly to migrate along the ventral nerve cord. (B,C,E,F) Examples of AVM axon migration defects in *unc-40* mutants.

|            |     |               |                                             |                      |               |             |        |     |
|------------|-----|---------------|---------------------------------------------|----------------------|---------------|-------------|--------|-----|
| human RGMa | 48  | CKILKCNSEFW   | SATSGSHAPASDDTP                             | -----                | EFCAALRSYAL   | CTR         | 87     |     |
| human RGMc | 37  | CKILRCNAEYV   | SSLTLSLRGGSSGALRGGGGGGRGGGVGSGGL            | -----                | CRALRSYAL     | CTR         | 91     |     |
| human RGMb | 95  | CRIQKCTTDFV   | SLTSHLNSAVDGFDS                             | -----                | EFCKALRAYAG   | CTQ         | 134    |     |
| DRAG-1     | 22  | CRVEECAAWFQ   | KTKDYENLVPKATER                             | -----                | YCQVLQTYLK    | CMN         | 60     |     |
|            |     |               | G99V                                        |                      |               |             |        |     |
| human RGMa | 88  | RTARTCRGDLA   | YHSAVHGI EDLMSQHNCSKDGPTSQPRLR              | - -                  | TLPPAGDSQERSD |             | 140    |     |
| human RGMc | 92  | RTARTCRGDLA   | FHSAVHGI EDLMIQHNCSTRQGPTAPPPRGPALP         |                      | GAGSGLP       | - - -       | 143    |     |
| human RGMb | 135 | RTSKACRGNLV   | YHSAVLGISDLMSQRNCSKDGPTSSSTNPEVTHDP         |                      | CNYHSHAG      | - -         | 187    |     |
| DRAG-1     | 61  | DTQRYCHGNLR   | FHSSSELIMRRHWKEFECEKWCSCNDNSHVKRKHVNTCYFNPP | - -                  |               |             | 113    |     |
|            |     |               | D172E                                       |                      |               |             |        |     |
| human RGMa | 141 | SPEICHYEKSF   | HK-HSATPNYTHCGLFGD                          | PHLRTFTDRFQ          | TCKVQGAWPL    | IDNNY       | 194    |     |
| human RGMc | 144 | APDPCDYEGRF   | SRLHGRPPGFLHCASF                            | GDPHVRSFHHFH         | FTCRVQGWAWPL  | LDNDF       | 198    |     |
| human RGMb | 188 | - - - - -     | AREHRRGDQNP                                 | SYLFCGLFGD           | PHLRTFKDNF    | QCKVEGAWPL  | IDNNY  | 235 |
| DRAG-1     | 114 | - - - - -     | PSNRKLLKYCS                                 | LFGD                 | PHLIMFNGSV    | QTCSEEGARPL | VDRY   | 153 |
|            |     |               |                                             |                      |               |             |        |     |
| human RGMa | 195 | LVQVTNTPTVL   | PGSAATATSKLTIIFKNFQEC                       | VQKVVYQAEMDE         | - -           | LPAAFVDGS   | 247    |     |
| human RGMc | 199 | LFVQATSSPMAL  | GANATATRKLTIIFKNMQEC                        | IDQKVVYQAEVDN        | - -           | LPVAFEDGS   | 251    |     |
| human RGMb | 236 | LSVQVTNVPVVP  | GSSATATNKITIIIFKAHHECT                      | DQKVVYQAVTDD         | - -           | LPAAFVDGT   | 288    |     |
| DRAG-1     | 154 | FLVQVTNRNVR   | GEALTTVTKVTVLVR                             | -KHNCTASLRYEASSDEEGL | PRGFVDGT      |             | 207    |     |
|            |     |               |                                             |                      |               |             |        |     |
| human RGMa | 248 | KHGGDKHGANSL  | KITEKVSQGHVEIQAKYIGTTI                      | VVRQVGRYLTFAVRMPEE   | VVN           |             | 302    |     |
| human RGMc | 252 | INGGDRPGGSSLS | IQTANPGNHVEIQAAAYIGTTI                      | IIRQTAGQLSFSIKVAED   | VAM           |             | 306    |     |
| human RGMb | 289 | TSGGD-SDAKSLR | IVERESGHYVEMHARYIGTTV                       | FVRQVGRYLTLAIRMPED   | LAM           |             | 342    |     |
| DRAG-1     | 208 | TFQMTSKHSVEV  | LWQD--DNYVEIALHFIHSSI                       | HIRRQGPYLSVSVRAPTI   | VLE           |             | 259    |     |
|            |     |               | G320V                                       |                      |               |             |        |     |
| human RGMa | 303 | AVEDWDSQGLYL  | CLRGCPLNQQIDF-QAFHTNAEGT                    | GARRLAAASPAPTAPETFP  |               |             | 356    |     |
| human RGMc | 307 | AFS--AEQDLQL  | CVGGCPPSQRLS-----RSERN--                    | RRGAI                | T-----        |             | 339    |     |
| human RGMb | 343 | SYE--ESQDLQL  | CVNGCPLSERIDDGQGVSA                         | ILGHSLPRTSLVQAWPG    | - - - -       | YT          | 391    |     |
| DRAG-1     | 260 | TGG--DVARELC  | WSGCRKSSRIPAELAVEMTKK                       | FAECYRRRVHVP         | - - - - -     |             | 302    |     |
|            |     |               |                                             |                      |               |             |        |     |
| human RGMa | 357 | YETA          | VAKCKEKL                                    | PVEDLYYQACVFDLLTTGD  | VHFTLAAYY     | ALEDV       | KMLHS  | 406 |
| human RGMc | 340 | IDTARRL       | CKEGLP                                      | VEDAYFHSCVFDVLISGDP  | NFTVAAQA      | ALEDAR      | FLP    | 389 |
| human RGMb | 392 | LETANTQ       | CHEKMP                                      | VKDIYFQSCVFDLLTTGD   | ANFTAAAH      | SALED       | VEALHP | 441 |
| DRAG-1     | 303 | KKVAEDR       | CKDIGNIG-VFFD                               | ACVFDLMFTGDDYL       | VHLSRAAES     | DFRRL       | LAP    | 351 |

**Fig. S2. DRAG-1 shares conserved features with human RGM proteins.** Sequence comparison between mature human RGMa, RGMb and RGMc (HFE2) and *C. elegans* DRAG-1 proteins, highlighting conserved residues (blue). The N- and C-terminal signal sequences are not shown. The black line underlines the partial vWF type D domain. The three JH (juvenile hemochromatosis) disease-associated hypomorphic mutations discussed in this paper are boxed in red (Lanzara et al., 2004).

Table S1. Plasmid constructs

| <b>Constructs for tissue-specific expression of <i>unc-40</i></b>                                                                                                                                                                  |
|------------------------------------------------------------------------------------------------------------------------------------------------------------------------------------------------------------------------------------|
| <i>pCXT261, unc-40p::unc-40 cDNA::gfp::unc-54 3'UTR</i>                                                                                                                                                                            |
| <i>pCXT262, elt-3p::unc-40 cDNA::gfp::unc-54 3'UTR</i>                                                                                                                                                                             |
| <i>pCXT264, rol-6p::unc-40 cDNA::gfp::unc-54 3'UTR</i>                                                                                                                                                                             |
| <i>pCXT266, hlh-8p::unc-40cDNA::gfp::unc-54 3'UTR</i>                                                                                                                                                                              |
| <i>pCXT265, unc-119p::unc-40cDNA::gfp::unc-54 3'UTR</i>                                                                                                                                                                            |
| <i>pCXT289, myo-3p::unc-40 cDNA::gfp::unc-54 3'UTR</i>                                                                                                                                                                             |
| <b>Mammalian cell culture expression constructs (all cloned into the pSecTag vector)</b>                                                                                                                                           |
| <i>pCXT239 (DRAG-1-FLAG), pCMV::signal peptide::DRAG-1 mature region (aa22-360)::FLAG</i>                                                                                                                                          |
| <i>pJKL962 (Myc-DRAG-1), pCMV::signal peptide::cMyc-His::DRAG-1 mature region (aa22-360)</i>                                                                                                                                       |
| <i>pCXT271 (DRAG-1<sup>G272V</sup>-FLAG), pCMV::signal peptide::DRAG-1 mature region (aa22-360)<sup>G272V</sup>::FLAG</i>                                                                                                          |
| <i>pCXT245 (Myc-FN5,6), pCMV::signal peptide::cMyc-His-UNC-40 FNIII 5-6 (aa852-1081)</i>                                                                                                                                           |
| <i>pCXT249(Myc-FN5,6 C-C'loop), pCMV::signal peptide::cMyc-His-UNC-40 FNIII 5-6 (aa852-1081) with aa987-993 mutated from DRASLAD to LDKNIPI</i>                                                                                    |
| <i>pCXT299 (Myc-FN5,6 C'strand), pCMV::signal peptide::cMyc-His-UNC-40 FNIII 5-6 (aa852-1081) with aa997-1002 mutated from TINYVA to IMETIS</i>                                                                                    |
| <i>pCXT300 (Myc-FN5,6 E-Floop), pCMV::signal peptide::cMyc-His-UNC-40 FNIII 5-6 (aa852-1081) with aa1011-1014 mutated from SNLL to MDLN</i>                                                                                        |
| <i>pJKL964 (Myc-SMA-6), pCMV::signal peptide::cMyc-His-SMA-6 full length (aa27-stop)</i>                                                                                                                                           |
| <i>pCXT230 (Myc-DAF-4), pCMV::signal sequence::cMyc-His-DAF-4 EXD- TM-partial ICD (aa33-468)</i>                                                                                                                                   |
| <i>pCXT241 (FLAG-DBL-1), pCMV::signal sequence::DBL-1 prodomain (aa32-238)::FLAG-DBL-1 mature region (aa239-stop)</i>                                                                                                              |
| <b>Constructs for making DRAG-1 and UNC-40 vertebrate and <i>C. elegans</i> hybrids</b>                                                                                                                                            |
| <i>pCXT161, drag-1p (-3977 to -1 and 4 to 1123)::drag-1 signal sequence:: mRgmb mature region::drag-1 C-signal sequence::unc-54 3'UTR, has aa23-375 of DRAG-1 replaced by aa59-414 of mouse Rgmb in pCXT15 (Tian et al., 2010)</i> |
| <i>pCXT185, drag-1p (-3977 to -1 and 4 to 1123)::drag-1 signal sequence:: hHJV mature region::drag-1 C-signal sequence::unc-54 3'UTR, has aa23-375 of DRAG-1 replaced by aa38-398 of human RGMc/HJV in pCXT15</i>                  |
| <i>pCXT278, unc-40p (-610 to -1)::unc-40 signal sequence::mDCC mature region::unc-54 3'UTR, has aa36-stop of UNC-40 replaced by aa34-stop of mDCC</i>                                                                              |
| <i>pCXT279, unc-40p (-610 to -1)::unc-40 signal sequence::mNeo1 mature region::unc-54 3'UTR, has aa36-stop of UNC-40 replaced by aa58-stop of mouse Neo1</i>                                                                       |
| <b>Constructs for <i>in vivo</i> structure-function analysis of UNC-40</b>                                                                                                                                                         |
| All constructs are derived from pZF22, a functional <i>unc-40::gfp</i> fusion described by Chan et al. (Chan et al., 1996)                                                                                                         |
| <i>pCXT253(ΔFN5), unc-40::gfp without aa852-939</i>                                                                                                                                                                                |
| <i>pCXT254(ΔFN6), unc-40::gfp without aa946-1041</i>                                                                                                                                                                               |
| <i>pCXT255(ΔFN5,6), unc-40::gfp without aa852-1041</i>                                                                                                                                                                             |
| <i>pCXT260 (UNC-40 EXD), unc-40 (aa1-1079)::gfp</i>                                                                                                                                                                                |
| <i>pCXT269(UNC-40 C-C' loop), unc-40::gfp with aa987-993 mutated from DRASLAD to LDKNIPI</i>                                                                                                                                       |
| <i>pCXT285(UNC-40 C' strand), unc-40::gfp with aa997-1002 mutated from TINYVA to IMETIS</i>                                                                                                                                        |
| <i>pCXT286(UNC-40 E-F loop), unc-40::gfp with aa1011-1014 mutated from SNLL to MDLN</i>                                                                                                                                            |
| <b>Constructs for expressing wild-type and mutant <i>drag-1</i> using the MosSCI technique</b>                                                                                                                                     |
| <i>pCXT208: wildtype DRAG-1 in pCFJ151</i>                                                                                                                                                                                         |
| <i>pCXT224: DRAG-1G68V (GGT to GTT) in pCFJ151</i>                                                                                                                                                                                 |
| <i>pCXT225: DRAG-1D117E (GAT to GAA) in pCFJ151</i>                                                                                                                                                                                |
| <i>pCXT223: DRAG-1G272V (GGA to GTA) in pCFJ151</i>                                                                                                                                                                                |
